# Supplementary material
Source: Springer Nature journal article supplement (https://www.springermedizin.de/resource/supplementary/12903_2008_114_MOESM1_ESM.pdf/9517422)

**Proportion (%) of responses  
within a health centre**

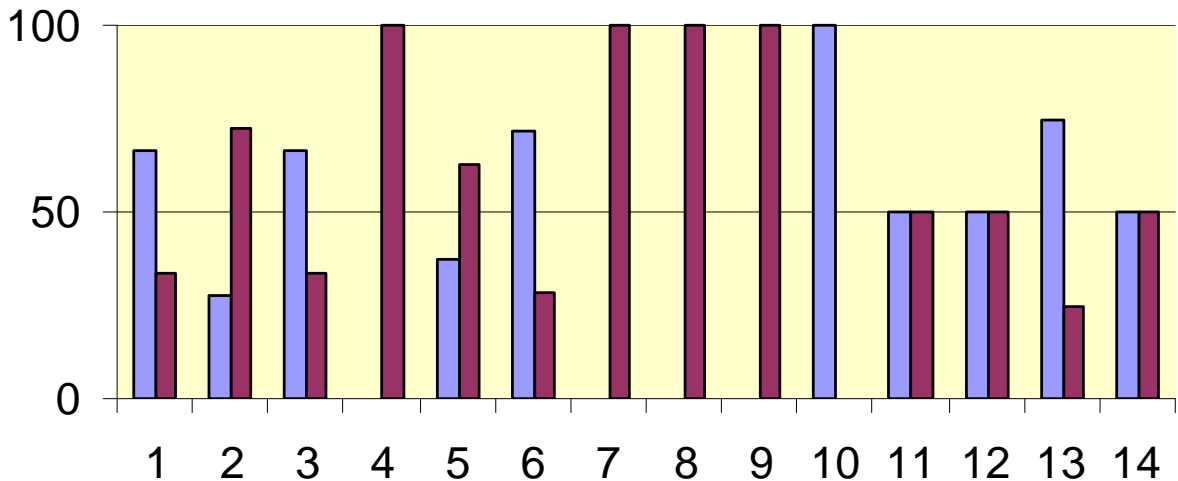

**Distribution of opinions among  
the respondents (N=82)**

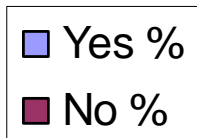

Supplement: MOESM1 [file 9517422]
